# Supplementary material for: Genomic relevance of FGF14 and associated genes on the prognosis of pancreatic cancer
Source: PubMed Central journal article supplement (PMC8168911; doi:10.1371/journal.pone.0252344), 2021-06-01
Supplement: pone.0252344.s001.pdf [file pone.0252344.s001.pdf]

# **Genomic Relevance of FGF14 and associated genes on the prognosis of Pancreatic Cancer**

Aroosha Raja, Muhammad Faraz Arshad Malik, Farhan Haq<sup>#</sup>

COMSATS University, Islamabad, Pakistan.

## **#Corresponding author**

Farhan Haq, PhD

COMSATS University, Islamabad

Email: [farhan.haq@comsats.edu.pk](mailto:farhan.haq@comsats.edu.pk)

Tel: +92-334-9540954

**S1 Fig.** Overall Workflow of the study.

**S2 Fig.** Kaplan Meier Analysis of genes in cohort 1. FGF14, FGFR1 overexpression was associated with better overall (A) (B) and overexpression of IGF2BP2, IGF2BP3 associated with lower overall survival (C) (D) of PDAC patients. (**\*p ≤ 0.05**) Red represents expression ≥ the median, while green represents expression < the median.

**S3 Fig.** Kaplan Meier Analysis of genes in cohort 2. FGF9, FGF13, FGF14, FGF17, FGFBP3, IGFBPL1 overexpression was associated with better overall survival (A) (B) (C) (D) (E) (H) and overexpression of FGFR1, IGFBP3, IGFL1 associated with lower overall survival (F) (G) (I) of PDAC patients. (**\*p ≤ 0.05**) Red represents expression ≥ the median, while green represents expression < the median.

**S4 Fig.** Kaplan Meier Analysis of genes in cohort 2. FGF9, FGF12, FGF13, FGF14, FGF17, FGFBP3, IGFBPL1 overexpression was associated with increased DFS (A) (C) (D) (E) (F) (G) (I) and overexpression of FGF10, FGFR1, IGFBP3, IGFL1 associated with reduced DFS (B) (H) (J) of PDAC patients. (**\*p ≤ 0.05**) Red represents expression ≥ the median, while green represents expression < the median.

**S5 Fig.** Common FGF14-Specific signature genes associated with survival in cohort 1 and 2 (**\*p ≤ 0.05**) Red represents expression ≥ the median, while green represents expression < the median.

**S6 Fig.** Correlation of FGF14 with IGF pathway genes

**S7 Fig.** Scatterplot showing correlation between FGF14 and FGFR1 in all three study cohorts

**S1 Table.** Clinicopathological characteristics of 65 PDAC patients of Cohort 1 (**\*p ≤ 0.05**)

**S2 Table.** Clinicopathological characteristics of 179 PDAC patients of Cohort 2 (**\*p ≤ 0.05**)

**S3 Table.** Clinicopathological characteristics of 288 PDAC patients of Cohort 3 (**\*p ≤ 0.05**)

**S4 Table.** Association of genes with clinicopathologic parameters in Cohort 1 (**\*p ≤ 0.05**)

**S5 Table.** Association of genes with clinicopathologic parameters in Cohort 2 (**\*p ≤ 0.05**)

**S6 Table.** Association of common genes with clinicopathologic parameters in Cohort 1 and 2 (**\*p ≤ 0.05**)

**S7 Table.** FGF14-Signature genes associated with survival in cohort 1 (**\*p ≤ 0.05**)

**S8 Table.** FGF14-Signature genes associated with survival in cohort 2 (**\*p ≤ 0.05**)

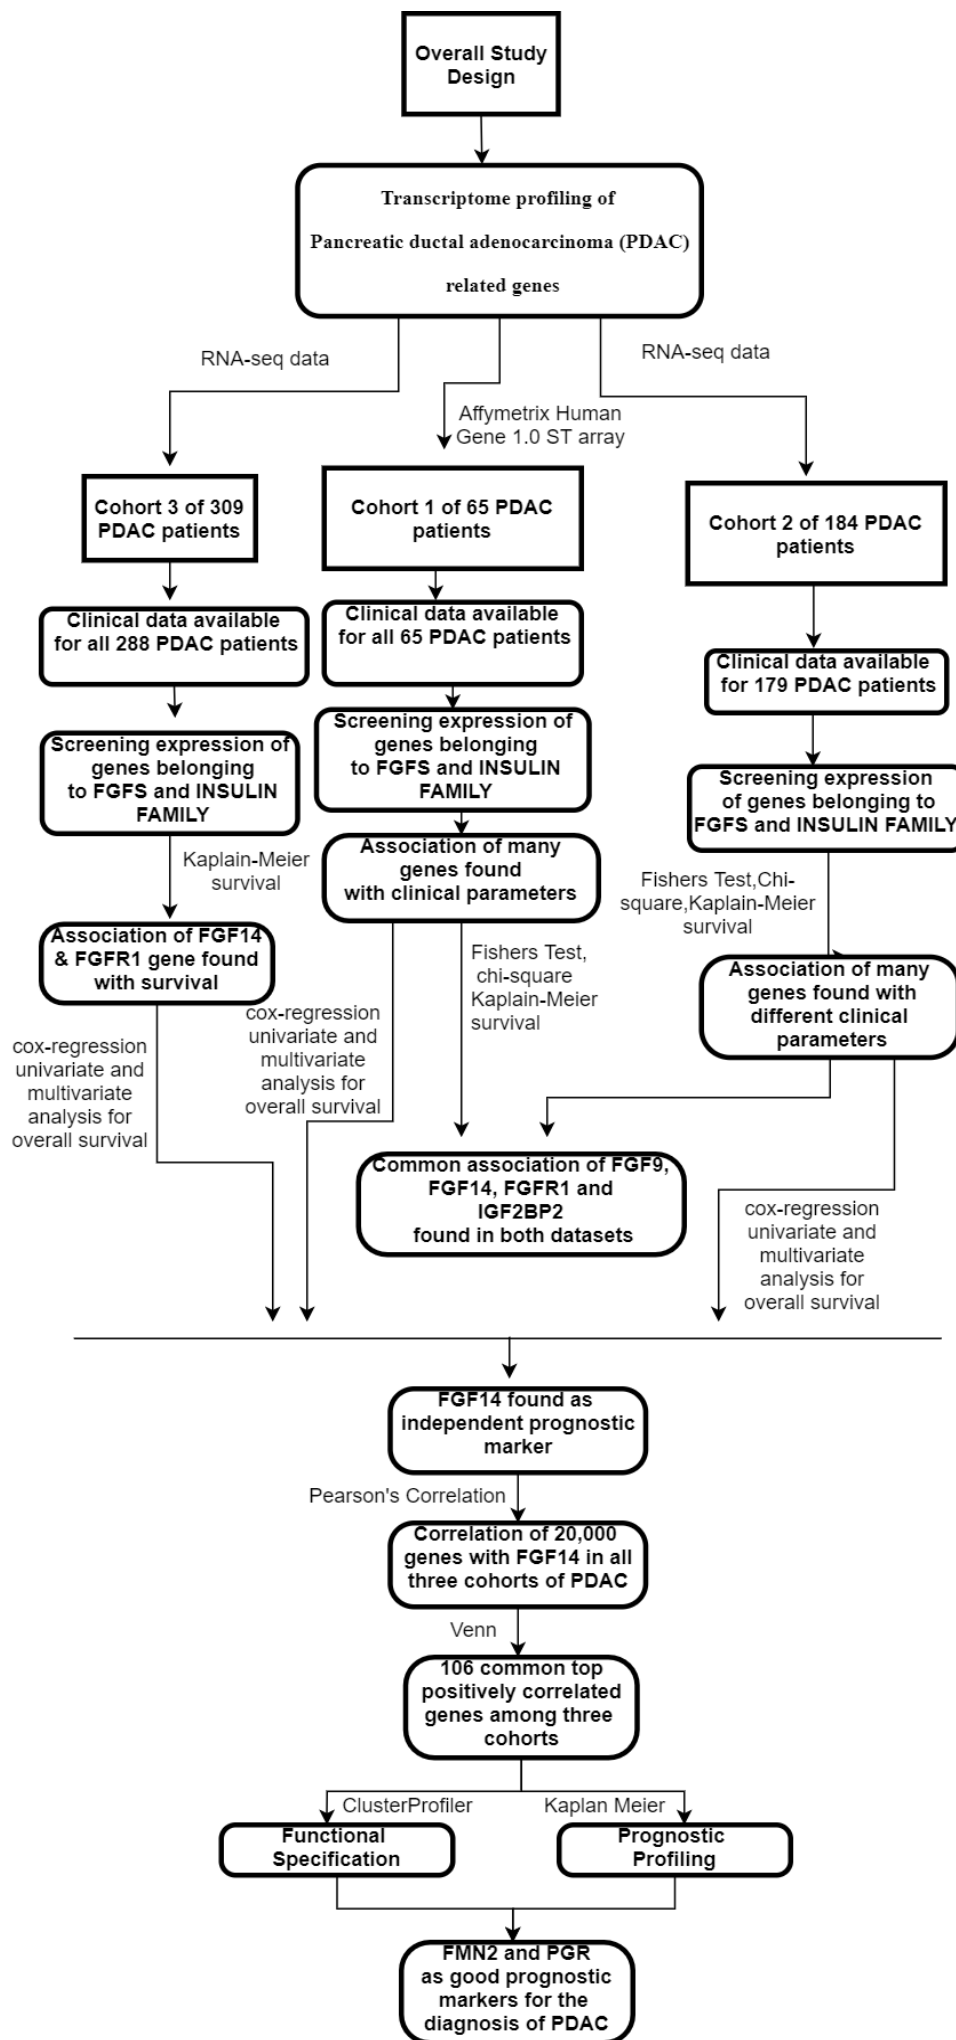

S1 Fig

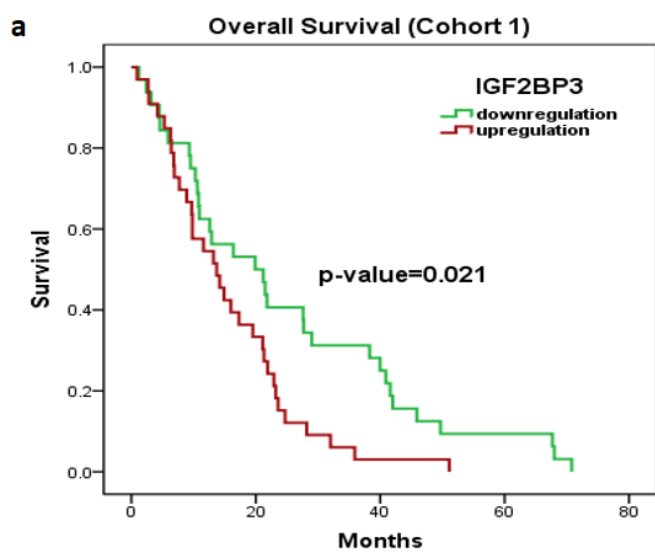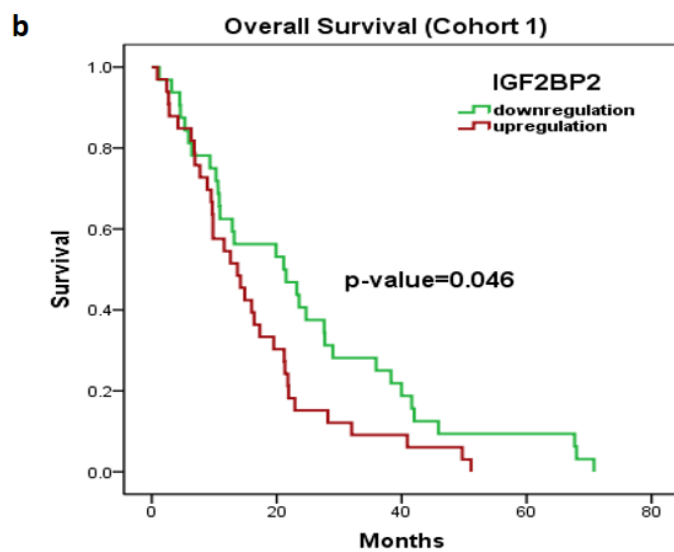

S2 Fig

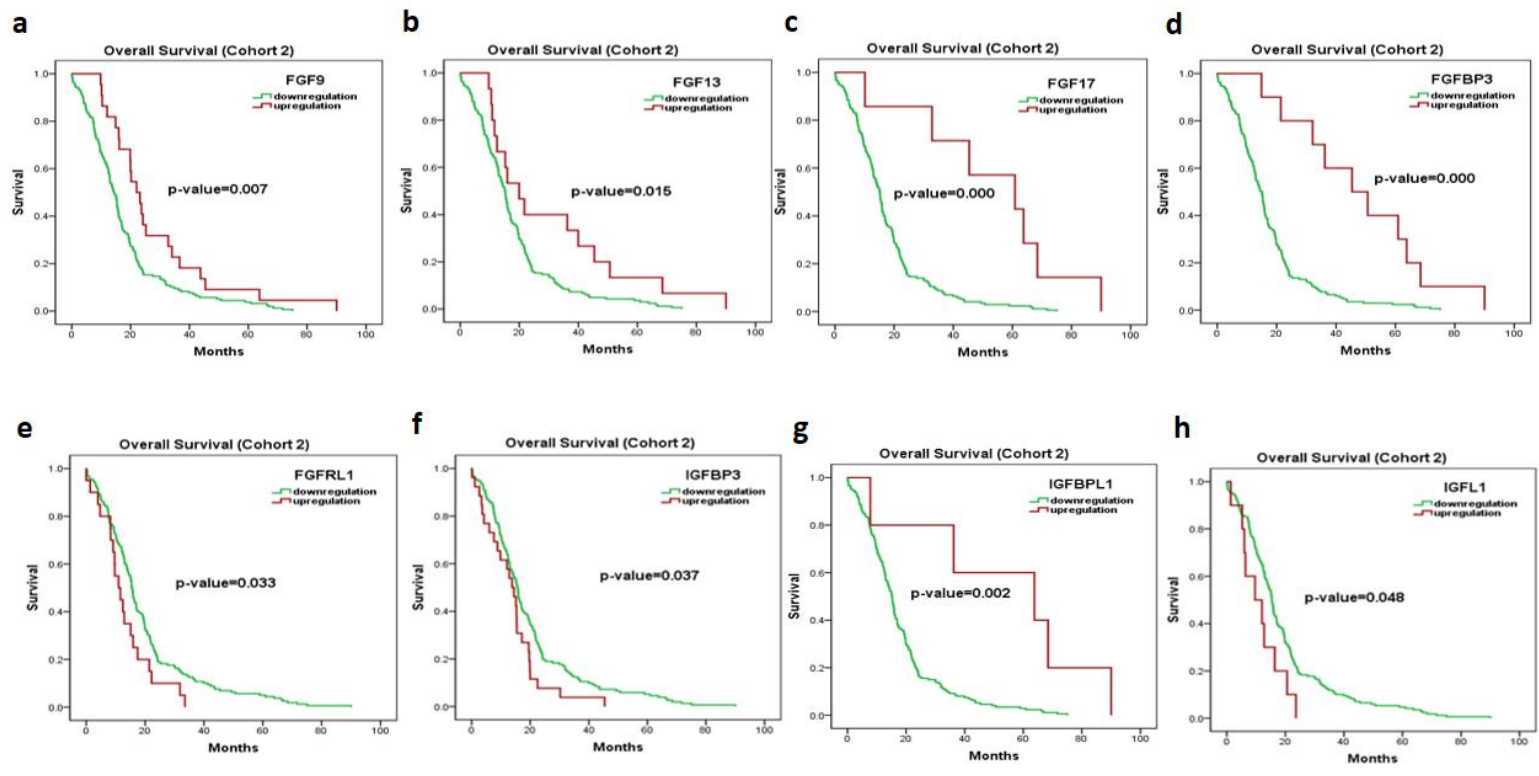

S3 Fig

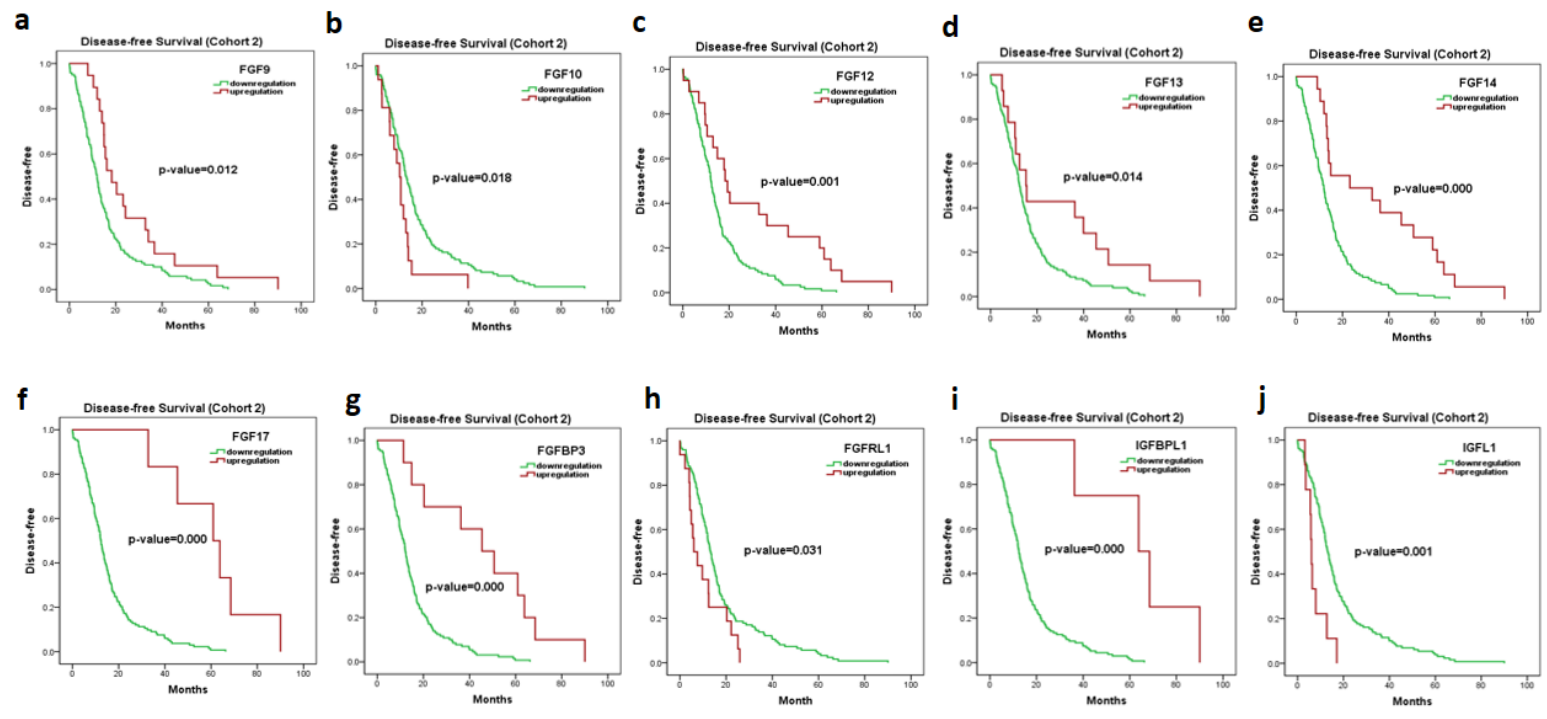

S4 Fig

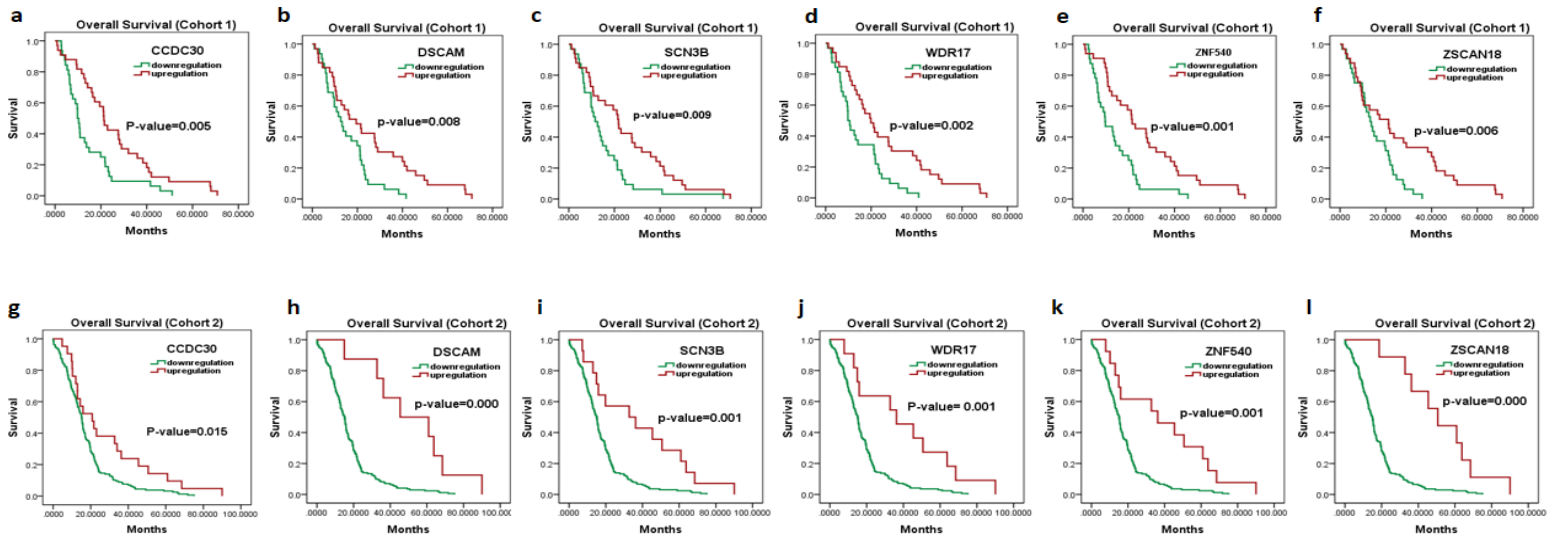

S5 Fig

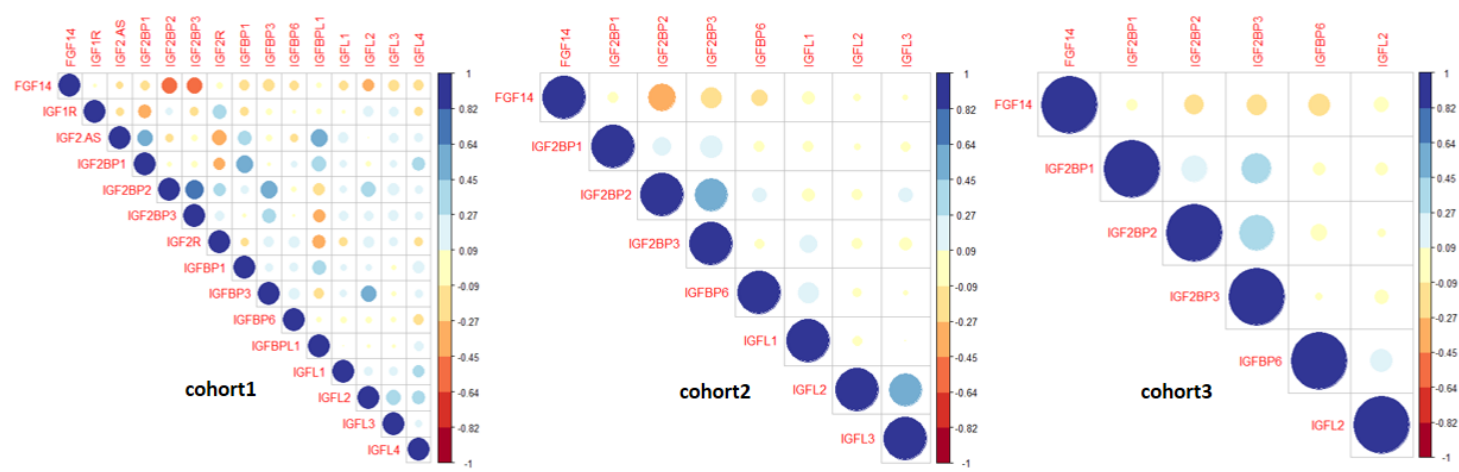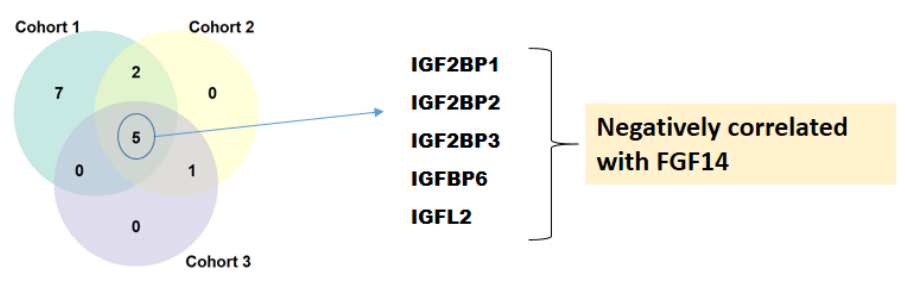

S6 Fig



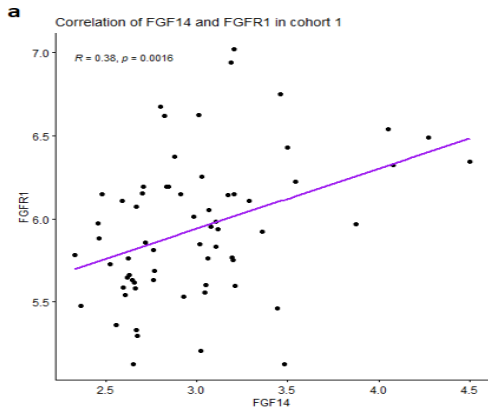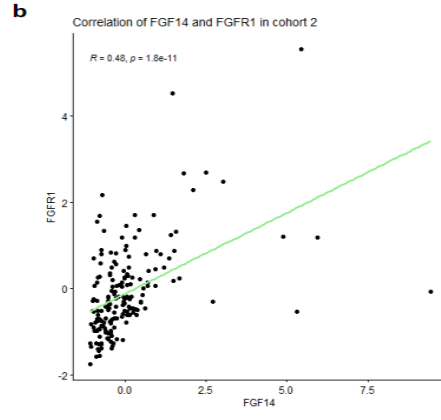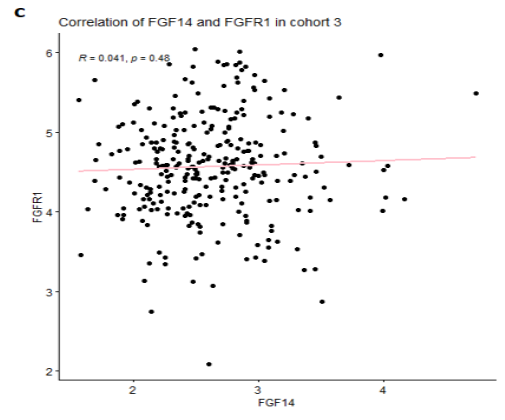

**S7 Fig**

**S1 Table**

| <b>Characteristics</b>    | <b>No.</b> | <b>Percentage</b> |
|---------------------------|------------|-------------------|
| <b>Stage</b>              |            |                   |
| Stage I, IA, IB, IIA, IIB | 49         | 75%               |
| Stage III, IV             | 16         | 25%               |
| <b>Grade</b>              |            |                   |
| G1 & G2                   | 34         | 52%               |
| G3 & G4                   | 30         | 46%               |
| GX                        | 1          | 2%                |
| <b>Dead/Alive</b>         |            |                   |
| Alive                     | 16         | 25%               |
| Dead                      | 49         | 75%               |

**S2 Table**

| <b>Characteristics</b>    | <b>No.</b> | <b>Percentage</b> |
|---------------------------|------------|-------------------|
| <b>Age</b>                |            |                   |
| <=50                      | 24         | 13%               |
| >50                       | 155        | 87%               |
| <b>Gender</b>             |            |                   |
| Male                      | 99         | 55%               |
| Female                    | 80         | 45%               |
| <b>Stage</b>              |            |                   |
| Stage I, IA, IB, IIA, IIB | 168        | 94%               |
| Stage III, IV             | 8          | 4%                |
| Discrepancy or (NA)       | 3          | 2%                |
| <b>Tumor (T)-stage</b>    |            |                   |
| T1, T2                    | 31         | 17%               |
| T3, T4                    | 146        | 82%               |
| Tx                        | 2          | 1%                |
| <b>Nodes</b>              |            |                   |
| N0                        | 50         | 27%               |
| N1 or greater             | 124        | 70%               |
| Nx                        | 5          | 3%                |
| <b>Metastasis</b>         |            |                   |
| M0                        | 80         | 45%               |
| M1 or greater             | 5          | 2%                |
| Mx                        | 94         | 53%               |
| <b>Residual</b>           |            |                   |
| R0                        | 107        | 60%               |
| R1 & R2                   | 58         | 33%               |
| Rx                        | 14         | 7%                |
| <b>Dead/Alive</b>         |            |                   |
| Alive                     | 86         | 48%               |

---

|                              |     |     |
|------------------------------|-----|-----|
| Dead                         | 93  | 52% |
| <b>Type-2 Diabetes (T2D)</b> |     |     |
| Yes                          | 38  | 21% |
| No                           | 109 | 61% |
| NA                           | 32  | 18% |
| <b>ALCOHOL</b>               |     |     |
| Yes                          | 102 | 57% |
| No                           | 65  | 36% |
| NA                           | 12  | 7%  |
| <b>Grade</b>                 |     |     |
| G1 & G2                      | 127 | 71% |
| G3 & G4                      | 50  | 28% |
| GX                           | 2   | 1%  |
| <b>Recurrence</b>            |     |     |
| DiseaseFree                  | 57  | 32% |
| Recurred/Progressed          | 82  | 45% |
| NA                           | 40  | 23% |

**S3 Table**

| <b>Characteristics</b> | <b>No.</b> | <b>Percentage</b> |
|------------------------|------------|-------------------|
| <b>Gender</b>          |            |                   |
| Male                   | 166        | 58%               |
| Female                 | 122        | 42%               |
| <b>Nodes</b>           |            |                   |
| N0                     | 76         | 26%               |
| N1 or greater          | 212        | 74%               |
| <b>Dead/Alive</b>      |            |                   |
| Alive                  | 107        | 37%               |
| Dead                   | 181        | 63%               |
| <b>T-stage</b>         |            |                   |
| T1, T2                 | 51         | 18%               |
| T3, T4                 | 237        | 82%               |

S4 Table

| Genes    | Classification             | Stage                      | Grade | Alive/Dead |
|----------|----------------------------|----------------------------|-------|------------|
| FGF6     | FGF Ligands                | NA                         | U     | NA         |
| FGF9     |                            | NA                         | U     | NA         |
| FGF14    |                            | NA                         | U     | NA         |
| FGFR1    | FGF Receptors              | U                          | U     | U          |
| FGFR1OP2 |                            | NA                         | U     | NA         |
| FGFR4    | IGF binding protein genes  | NA                         | U     | NA         |
| IGFBP4   |                            | U                          | NA    | NA         |
| IGF2BP3  |                            | NA                         | U     | NA         |
| IGF2BP2  |                            | NA                         | U     | NA         |
| IGFL2    |                            | Insulin growth factor gene | NA    | U          |
| IRS1     | Insulin receptor substrate | NA                         | U     | NA         |

**U** = upregulated in

advance stages, dead;

**U** = upregulated in early stages, living;

NA = no significant association;

S5 Table

| Genes   | Classification                 | Gender | Age | Grade | Stage | Recurrence | Residual | Nodes | Dead/Alive | Diabetes | Alcohol |
|---------|--------------------------------|--------|-----|-------|-------|------------|----------|-------|------------|----------|---------|
| FGF1    | FGF Ligands                    | NA     | NA  | NA    | NA    | NA         | NA       | U     | NA         | NA       | NA      |
| FGF2    |                                | U      | NA  | NA    | NA    | U          | NA       | NA    | U          | NA       | NA      |
| FGF4    |                                | NA     | U   | NA    | NA    | NA         | NA       | NA    | NA         | NA       | NA      |
| FGF7    |                                | NA     | NA  | U     | NA    | NA         | NA       | NA    | NA         | U        | NA      |
| FGF9    |                                | NA     | NA  | U     | NA    | NA         | NA       | U     | NA         | NA       | NA      |
| FGF12   |                                | NA     | NA  | NA    | U     | U          | NA       | NA    | U          | NA       | NA      |
| FGF13   |                                | NA     | NA  | NA    | NA    | U          | NA       | NA    | NA         | NA       | NA      |
| FGF14   |                                | NA     | NA  | U     | U     | U          | U        | U     | U          | NA       | NA      |
| FGF17   |                                | NA     | NA  | NA    | U     | U          | NA       | NA    | NA         | NA       | NA      |
| FGF18   |                                | NA     | NA  | U     | NA    | NA         | NA       | NA    | NA         | NA       | NA      |
| FGFR1   | FGF Receptors                  | NA     | NA  | NA    | U     | U          | U        | NA    | U          | NA       | NA      |
| FGFR2   |                                | NA     | NA  | NA    | NA    | NA         | NA       | NA    | NA         | U        | NA      |
| FGFR4   |                                | NA     | NA  | NA    | NA    | U          | NA       | NA    | NA         | U        | NA      |
| FGFBP1  | FGFs Binding protein genes     | NA     | NA  | U     | NA    | NA         | NA       | NA    | NA         | NA       | NA      |
| FGFBP3  |                                | NA     | NA  | NA    | U     | U          | NA       | NA    | U          | NA       | NA      |
| IGF1R   | Insulin growth factor receptor | NA     | NA  | NA    | U     | NA         | NA       | NA    | NA         | NA       | NA      |
| IGF1    | Insulin growth factor genes    | NA     | NA  | U     | NA    | NA         | NA       | NA    | NA         | NA       | NA      |
| IGFL3   |                                | U      | NA  | NA    | NA    | NA         | U        | NA    | NA         | NA       | NA      |
| IGFL4   |                                | U      | NA  | NA    | NA    | U          | NA       | NA    | NA         | NA       | NA      |
| IGFBP6  |                                | NA     | NA  | NA    | NA    | U          | NA       | NA    | NA         | NA       | NA      |
| IGF2BP2 | IGF binding protein genes      | NA     | NA  | NA    | U     | U          | NA       | NA    | NA         | NA       | NA      |
| IGF2BP3 |                                | NA     | U   | NA    | NA    | U          | NA       | NA    | NA         | NA       | NA      |
| IGFBPL1 |                                | NA     | NA  | NA    | U     | U          | NA       | NA    | NA         | NA       | NA      |
| INSR    | Insulin receptor gene          | NA     | NA  | NA    | NA    | U          | NA       | NA    | U          | NA       | NA      |
| INSRR   |                                | U      | NA  | NA    | U     | NA         | NA       | NA    | NA         | NA       | NA      |
| IRS2    | Insulin receptor substrate     | NA     | NA  | NA    | NA    | NA         | NA       | NA    | NA         | NA       | U       |

**U** = upregulated in advance stages, yes, >50, female, dead, recurred;

**U** = upregulated in early stages, no, <=50, male, living, disease-free;

NA = no significant association;

S6 Table

| Genes   | Classification            | Grade | Stage | Nodes | Residual | Dead/Alive | Recurrence |
|---------|---------------------------|-------|-------|-------|----------|------------|------------|
| FGF9    | FGF Ligands               | U     | NA    | U     | NA       | NA         | NA         |
| FGF14   |                           | U     | U     | U     | U        | U          | U          |
| FGFR1   | FGF Receptor              | U     | U     | NA    | U        | U          | U          |
| IGF2BP2 | IGF binding protein genes | U     | U     | NA    | NA       | NA         | U          |

U = upregulated in advance stages, dead, recurred;  
U = upregulated in early stages, living, disease-free;  
 NA = no significant association;



**S7 Table**

| <b>Genes</b> | <b>P-value</b> | <b>Association</b>          |
|--------------|----------------|-----------------------------|
| CCDC30       | 0.005          | Overexpression with good OS |
| DSCAM        | 0.008          | Overexpression with good OS |
| FGF14        | 0.001          | Overexpression with good OS |
| FMN2         | 0.01           | Overexpression with good OS |
| SCN3B        | 0.009          | Overexpression with good OS |
| WDR17        | 0.002          | Overexpression with good OS |
| ZNF540       | 0.001          | Overexpression with good OS |
| ZSCAN18      | 0.006          | Overexpression with good OS |
| ANKS1B       | 0.002          | Overexpression with good OS |
| CNTN5        | 0.005          | Overexpression with good OS |
| KCTD16       | 0.009          | Overexpression with good OS |
| KIAA0319     | 0.025          | Overexpression with good OS |
| KRT222       | 0.029          | Overexpression with good OS |
| NCAM1        | 0.05           | Overexpression with good OS |
| PCSK1        | 0.027          | Overexpression with good OS |
| PGR          | 0              | Overexpression with good OS |
| PPM1E        | 0.01           | Overexpression with good OS |
| RGN          | 0.002          | Overexpression with good OS |
| SNAP91       | 0.007          | Overexpression with good OS |
| TRPM3        | 0.045          | Overexpression with good OS |

**S8 Table**

| <b>Genes</b> | <b>P-value</b> | <b>Association</b>          |
|--------------|----------------|-----------------------------|
| ACTL6B       | 0.000          | Overexpression with good OS |
| AK9          | 0.003          | Overexpression with good OS |
| APBB1        | 0.000          | Overexpression with good OS |
| ARNT2        | 0.002          | Overexpression with good OS |
| ASTN1        | 0.001          | Overexpression with good OS |
| ATP8A1       | 0.019          | Overexpression with good OS |
| ATRNL1       | 0.001          | Overexpression with good OS |
| CDIP1        | 0.001          | Overexpression with good OS |
| CAMK2B       | 0.000          | Overexpression with good OS |
| CCDC30       | 0.015          | Overexpression with good OS |
| CES4A        | 0.001          | Overexpression with good OS |
| CLGN         | 0.000          | Overexpression with good OS |
| CPEB1        | 0.05           | Overexpression with good OS |
| DDX25        | 0.002          | Overexpression with good OS |
| DPY19L2      | 0.001          | Overexpression with good OS |
| DSCAM        | 0.000          | Overexpression with good OS |
| EFR3B        | 0.000          | Overexpression with good OS |
| ELAC1        | 0.000          | Overexpression with good OS |
| ELAVL4       | 0.024          | Overexpression with good OS |
| EML5         | 0.004          | Overexpression with good OS |
| EPHA5        | 0.013          | Overexpression with good OS |
| FAM135B      | 0.001          | Overexpression with good OS |
| FGF14        | 0.000          | Overexpression with good OS |
| FMN2         | 0.001          | Overexpression with good OS |

|          |       |                             |
|----------|-------|-----------------------------|
| GDAP1    | 0.002 | Overexpression with good OS |
| GRIA3    | 0.001 | Overexpression with good OS |
| HFM1     | 0.000 | Overexpression with good OS |
| HYDIN    | 0.004 | Overexpression with good OS |
| KCNH6    | 0.000 | Overexpression with good OS |
| KCNMB2   | 0.002 | Overexpression with good OS |
| KCNT2    | 0.002 | Overexpression with good OS |
| KIAA1324 | 0.001 | Overexpression with good OS |
| LRRTM4   | 0.017 | Overexpression with good OS |
| MCF2L2   | 0.001 | Overexpression with good OS |
| MLXIPL   | 0.004 | Overexpression with good OS |
| MTMR7    | 0.001 | Overexpression with good OS |
| MTUS2    | 0.028 | Overexpression with good OS |
| NAP1L2   | 0.001 | Overexpression with good OS |
| NEURL1   | 0.000 | Overexpression with good OS |
| NLGN1    | 0.006 | Overexpression with good OS |
| NPAS3    | 0.007 | Overexpression with good OS |
| TENM1    | 0.019 | Overexpression with good OS |
| PTPRS    | 0.006 | Overexpression with good OS |
| RBM11    | 0.000 | Overexpression with good OS |
| REEP2    | 0.000 | Overexpression with good OS |
| SCG3     | 0.001 | Overexpression with good OS |
| SCN3B    | 0.001 | Overexpression with good OS |
| SLC7A14  | 0.004 | Overexpression with good OS |
| SNAP25   | 0.000 | Overexpression with good OS |
| SPTB     | 0.004 | Overexpression with good OS |
| SSTR2    | 0.000 | Overexpression with good OS |
| ST18     | 0.001 | Overexpression with good OS |
| SYT4     | 0.000 | Overexpression with good OS |
| SYT5     | 0.000 | Overexpression with good OS |
| TMEM175  | 0.000 | Overexpression with good OS |
| TMEM63C  | 0.000 | Overexpression with good OS |
| UNC80    | 0.000 | Overexpression with good OS |
| VWDE     | 0.041 | Overexpression with good OS |
| WDR17    | 0.001 | Overexpression with good OS |
| ZNF540   | 0.001 | Overexpression with good OS |
| ZSCAN18  | 0.001 | Overexpression with good OS |
| CTNND2   | 0.015 | Overexpression with good OS |
| KCNK16   | 0.005 | Overexpression with good OS |
| LRRTM2   | 0.014 | Overexpression with good OS |
| PGR      | 0.028 | Overexpression with good OS |
| RGS9     | 0.008 | Overexpression with good OS |
| ULK4     | 0.005 | Overexpression with good OS |
